# Supplementary material for: Effect of Electrochemical Hydrogen Charging on Blistering and Mechanical Properties Behavior of Q690 Steel
Source: MDPI journal article supplement (doi:10.3390/cryst13060918), 2023-06-07
Supplement: s1 [file s1]

Archive with 1 entries (1 files):
- crystals-2429352-supplementary.pdf
