# Supplementary material for: Effect of Electrochemical Hydrogen Charging on Blistering and Mechanical Properties Behavior of Q690 Steel
Source: MDPI journal article supplement (doi:10.3390/cryst13060918), 2023-06-07
Supplement: s1 [file s1 › crystals-2429352-supplementary.pdf]

## **Effect of electrochemical hydrogen charging on blistering and mechanical properties behavior of Q690 steel**

**Figure S1.** Schematic diagram of the experimental setup for hydrogen charging used in hydrogen charging tests.

**Figure S2.** Schematic diagram of the processing (a) and geometry (b) of tensile specimens used in SSRT tests as well as the schematic diagram of the experimental setup (c).

**Table S1.** Relevant parameters of hydrogen charging experiments.

**Table S2.** Ultimate tensile strength, elongation, and energy density of Q690 alloy at different hydrogen charging current densities.

**Figure S1.** Schematic diagram of the experimental setup for hydrogen charging used in hydrogen charging tests.

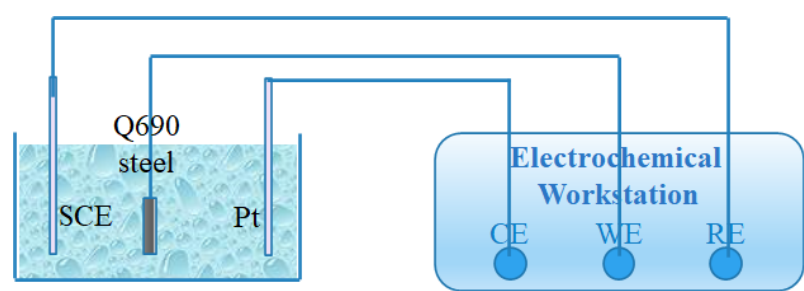

**Figure S2.** Schematic diagram of the processing (a) and geometry (b) of tensile specimens used in SSRT tests as well as the schematic diagram of the experimental setup (c).

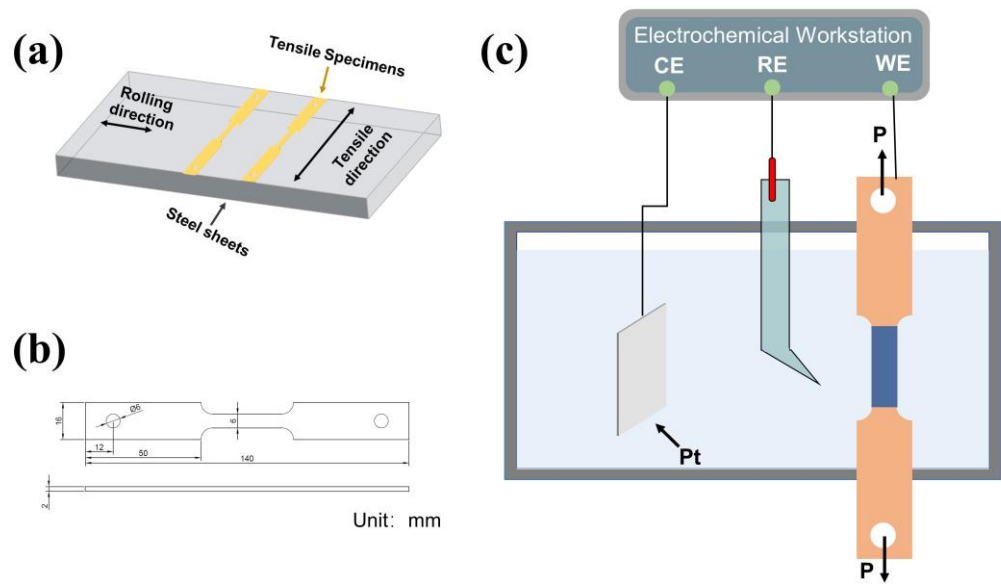

**Table S1.** Relevant parameters of hydrogen charging experiments.

| Environment          | 2 mA/cm <sup>2</sup> | 5 mA/cm <sup>2</sup> | 10 mA/cm <sup>2</sup> | 50 mA/cm <sup>2</sup> |
|----------------------|----------------------|----------------------|-----------------------|-----------------------|
| Hydrogen charging    | 1, 2, 4, 6,<br>12 h  | 1, 2, 4, 6,<br>12 h  | 1, 2, 4, 6,<br>12 h   | 1, 2, 4, 6,<br>12 h   |
| Surface morphologies | 12 h                 | 12 h                 | 12 h                  | 12 h                  |
| CLSM                 | 1, 2, 4, 6,<br>12 h  | 1, 2, 4, 6,<br>12 h  | 1, 2, 4, 6,<br>12 h   | 1, 2, 4, 6,<br>12 h   |

**Table S2.** Ultimate tensile strength, elongation, and energy density of Q690 alloy at different hydrogen charging current densities.

| Environment           | Ultimate tensile strength<br>(MPa) | Elongation<br>(%) | The energy density<br>(MJ/m <sup>3</sup> ) |
|-----------------------|------------------------------------|-------------------|--------------------------------------------|
| Air                   | 848.54                             | 13.18             | 91.65                                      |
| 2 mA/cm <sup>2</sup>  | 821.93                             | 6.83              | 40.30                                      |
| 5 mA/cm <sup>2</sup>  | 832.84                             | 4.28              | 20.51                                      |
| 10 mA/cm <sup>2</sup> | 657.56                             | 3.32              | 12.30                                      |
| 50 mA/cm <sup>2</sup> | 570.01                             | 2.59              | 8.32                                       |
